# Supplementary material for: Biomimetic all-weather dual-mode cooling film for passive heat dissipation
Source: Research Square preprint supplement (doi:10.21203/rs.3.rs-7497849/v1), 2025-11-03
Supplement: Supplementary file 1 [file 4430858614b266dda5819dcc.docx]

Biomimetic all-weather dual-mode cooling film for passive heat dissipation

Zhen Lia*; Jinqiu Yanga; Xiangdong Zenga；Zhengfeng Xionga; Jingjia Lia; Xiuping Sub; Yadong Lia

a Nanxun Innovation Institute, Zhejiang University of Water Resources and Electric Power, Hangzhou, 310018, China

b Key Laboratory of Functional Fibers and Intelligent Textiles, Yuanpei College, Shaoxing University, Shaoxing 312000, China

Before PEI-modified, cellulose powder was white (Figure S1a) and aggregate together with irregular microstructural (Figure S1b).


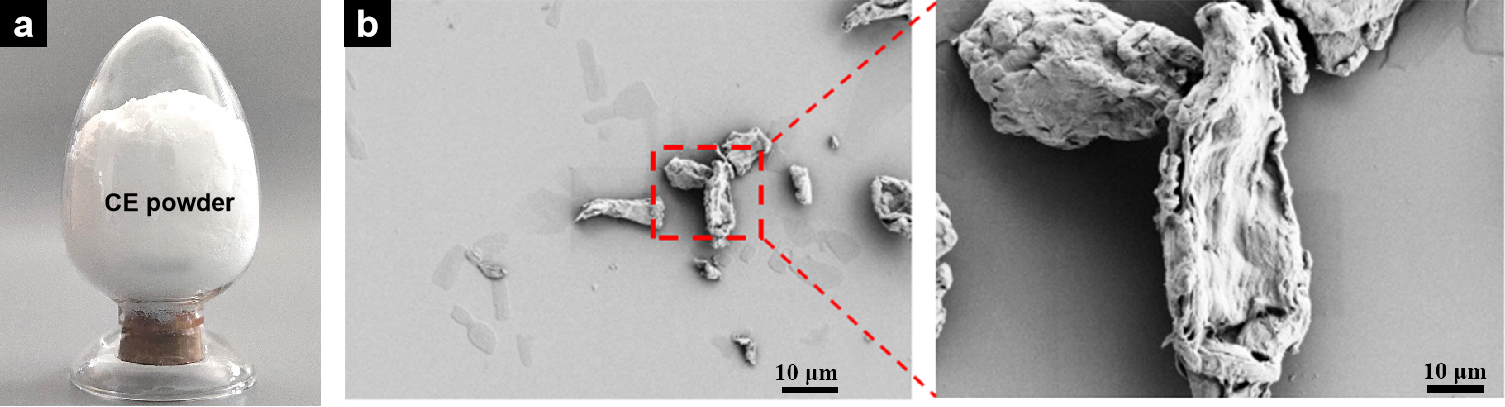


Figure S1 (a) The picture of cellulose powder; (b) The SEM spectrum of cellulose powder.

To verify the heat dissipation performance of the film under real-world conditions, an outdoor experiment was conducted. Four PT-100 thermocouple monitors be used to record real-time temperature changes for both indoor and outdoor environments. Figure S2 shows the distribution of the corresponding temperature detection probe and humidity detection probe.


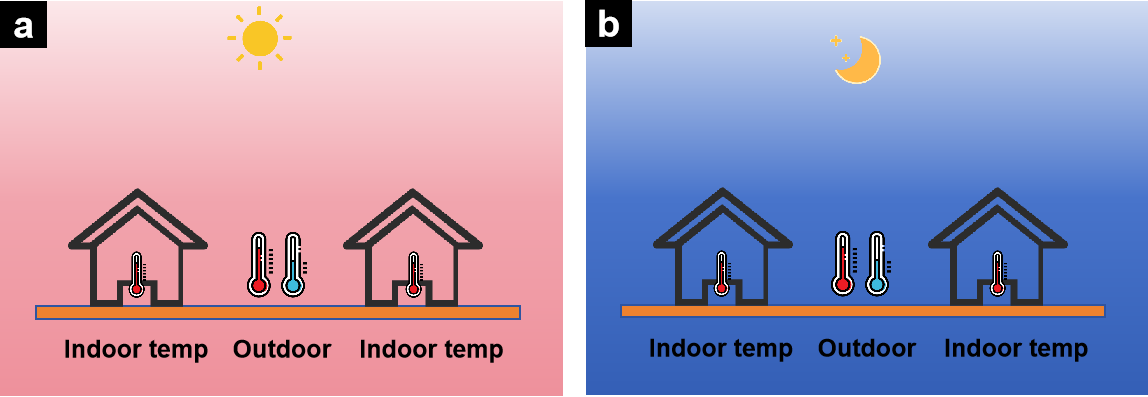


Figure S1. The distribution of the corresponding temperature detection probe and humidity detection probe (a) in the daytime; (b) in the nighttime.
